# Supplementary material for: Antibiotic Resistance Genes Carried by Commensal Escherichia coli from Shelter Cats in Italy
Source: MDPI journal article supplement (doi:10.3390/vetsci10120680), 2023-11-28
Supplement: s1 [file s1]

**Supplementary Materials Table S1.** Real-Time PCR primers for ESBL profile determination

| Target gene                 | Primer sequence (5'→3') |                                          |
|-----------------------------|-------------------------|------------------------------------------|
| <i>bla<sub>TEM</sub></i>    | Forward                 | GCATCTTACGGATGGCATGA                     |
|                             | Reverse                 | GTCTCCGATCGTTGTCAGAA                     |
|                             | Probe                   | FAM-CAGTGCTGCCATAACCATGAGTGA-BHQ-1       |
| <i>bla<sub>SHV</sub></i>    | Forward                 | TCCCATGATGAGCACCTTTAAA                   |
|                             | Reverse                 | TCCTGCTGGCGATAGTGGAT                     |
|                             | Probe                   | Cy5-TGCCGGTGACGAACAGCTGGAG-BBQ-650       |
| <i>bla<sub>CTXM_A</sub></i> | Forward                 | CGGGCRATGGCGCARAC                        |
|                             | Reverse                 | TGCRCCGGTSGTATTGCC                       |
|                             | Probe                   | FAM-CCARCGGGCGCAGYTGGTGAC-BHQ1           |
| <i>bla<sub>CTXM_B</sub></i> | Forward                 | ACCGAGCCSACGCTCAA                        |
|                             | Reverse                 | CCGCTGCCGGTTTTATC                        |
|                             | Probe                   | Yakima Yellow- CCCGCGYGATACCACCACGC-BHQ1 |
| <i>bla<sub>CMY</sub></i>    | Forward                 | GGCAAACAGTGGCAGGGTAT                     |
|                             | Reverse                 | AATGCGGCTTTATCCCTAACG                    |
|                             | Probe                   | ROX-CCTACCGCTGCAGATCCCCGATG-BHQ-2        |

**Supplementary Materials Table S2.** Target ARGs detected, primer pairs and annealing temperature used

| Antibiotic       | Target gene   | Primer sequence (5'→3')                          | Amplicon size (bp) | Annealing temperature (°C) | References |
|------------------|---------------|--------------------------------------------------|--------------------|----------------------------|------------|
| Tetracyclines    | <i>tet(A)</i> | GCTACATCCTGCTTGCCTTC<br>CATAGATCGCCGTGAAGAGG     | 210                | 60                         | [19]       |
|                  | <i>tet(B)</i> | TTGGTTAGGGGCAAGTTTGT<br>GTAATGGGCCAATAACACCG     | 659                | 60                         |            |
| Sulphonamides    | <i>sul1</i>   | TCACCGAGGACTCCTTCTTC<br>AATATCGGGATAGAGCGCAG     | 316                | 50                         | [20]       |
|                  | <i>sul2</i>   | TCCGGTGGAGGCCGGTATCTGG<br>CGGGAATGCCATCTGCCTTGAG | 191                | 58                         | [21]       |
| Fluoroquinolones | <i>gyrA</i>   | AAATCTGCCCCTGTCGTTGGT<br>GCCATACCTACGGCGATACC    | 344                | 60                         | [22]       |
|                  | <i>parC</i>   | CTGAATGCCAGCGCCAAATT<br>GCGAACGATTTTCGGATCGTC    | 188                | 60                         |            |
| Class 1 integron | <i>int1</i>   | GGCTTCGTGATGCCTGCTT<br>CATTCCTGGCCGTGGTTCT       | 148                | 55                         | [19]       |
